# Supplementary material for: A Network Study of Chinese Medicine Xuesaitong Injection to Elucidate a Complex Mode of Action with Multicompound, Multitarget, and Multipathway
Source: Hindawi journal article supplement (doi:10.1155/2013/652373), 2013-01-01
Supplement: f2 [file 652373.f2.xlsx]

## Sheet: Sheet1
GENENAME	EntrezGeneID	FC	RR
Ar	24208	0.871663	4.2368
Ckm	24265	1.13088	0.741087
Cyp1a1	24296	9.34923	3.95056
Ace	24310	0.677911	1.59299
Grin2a	24409	1.12237	2.75986
Igf1	24482	0.593875	1.25588
Il1b	24494	0.783044	1.26601
Nos1	24598	1.45914	0.681896
Nos2	24599	1.31676	0.869244
Nos2	24599	0.667439	11.3344
Nos3	24600	1.5082	2.04896
Nppa	24602	0.692485	0.781913
Npy	24604	0.651189	3.84769
Nras	24605	0.895072	3.56946
Serpine1	24617	0.749054	0.823946
Pdgfrb	24629	0.727241	0.848238
Pdgfrb	24629	0.771346	0.834126
Pdgfrb	24629	0.701161	0.788471
Tnf	24835	1.35805	2.94613
Tp53	24842	1.54457	6.28956
Bcl2l1	24888	1.22575	2.6644
Th	25085	1.21894	1.34855
Slc2a4	25139	1.33628	0.845622
Slc2a4	25139	1.12471	2.30957
Cdkn2a	25163	0.647003	1.48481
Mmp7	25335	0.398837	0.850065
Casp3	25402	0.773034	25.0389
Casp3	25402	0.762777	0.945725
Crp	25419	0.3466	1.08143
Fosl1	25445	0.768421	0.937637
Nfkbia	25493	1.62435	1.97781
Plau	25619	0.660142	0.691268
Fn1	25661	0.646161	5.69959
Smad1	25671	0.883455	0.922017
Plat	25692	0.867965	0.660307
Col1a1	29393	0.489984	2.23818
Col1a1	29393	0.479599	1.31108
Aif1	29427	0.816341	0.644802
Aif1	29427	2.2142	2.0819
Ptgs2	29527	0.701596	0.736638
Timp2	29543	0.654905	1.32874
Adam10	29650	0.803744	0.915546
App	54226	0.864033	0.717504
App	54226	0.851356	0.692857
App	54226	0.726111	1.17186
Casp9	58918	1.42979	3.88629
Casp9	58918	0.61376	1.03225
Ccnd1	58919	0.801528	1.95661
Ntrk1	59109	0.660887	0.733965
Bad	64639	0.870232	0.774739
Acta2	81633	0.637273	2.15265
Creb1	81646	0.739881	1.05754
Mmp2	81686	0.671055	1.00079
Col3a1	84032	0.573596	3.32545
Ctnnb1	84353	2.35153	1.01849
Foxo1	84482	0.475452	1.19154
Foxo1	84482	0.813008	2.01771
Ccna2	114494	0.595077	0.887777
Cdkn1a	114851	0.633679	5.86529
Dusp1	114856	1.16431	5.83042
Dusp1	114856	1.16526	2.07843
Timp1	116510	0.760379	1.33141
Mapk8	116554	1.13804	1.05037
Mapk8	116554	0.826687	2.06731
Mmp12	117033	0.502108	0.957597
Rhoa	117273	0.891126	0.618631
Tnfsf11	117516	2.35191	1.21161
Cdk5	140908	0.883204	0.921548
Cd40	171369	0.889239	0.680476
Cxcl10	245920	2.60043	2.25906
Fas	246097	0.898104	1.03021
Il4	287287	0.591001	1.49385
Serpinf1	287526	0.684778	1.15773
Serpinf1	287526	0.475373	1.20722
Tjp1	292994	0.841573	1.55475
Nfatc4	305897	0.888415	1.00108
Itgb2	309684	0.702896	1.24345
Ngf	310738	0.815642	37.0889
A2m	24153	0.757175	1.0394
Adcyap1r1	24167	0.447026	1.93231
Adcyap1r1	24167	1.53051	2.31081
Add1	24170	0.893422	0.873737
Add2	24171	0.597661	1.0459
Adra1b	24173	1.39961	0.914569
Adra2b	24174	0.713615	3.24442
Adra2c	24175	1.49507	0.833335
Agt	24179	0.56755	1.95282
Agtr1a	24180	0.659984	1.0037
Agtr1a	24180	0.616712	1.26977
Agtr2	24182	1.57517	1.56993
Agtr2	24182	1.11897	1.14025
Ak1	24183	0.883861	5.47745
Alb	24186	2.98085	1.03915
Aldoc	24191	1.40233	11.8401
Apoc3	24207	0.491806	3.01016
Avp	24221	1.32362	0.731244
Calca	24241	1.67691	0.745588
Cftr	24255	1.12137	62.7042
Cp	24268	0.724778	0.721193
Cp	24268	0.607699	0.803035
Cp	24268	0.685329	0.993092
Cryaa	24273	0.722883	1.3909
Cyp4a2 /// Cyp4a3	24306	0.643539	0.696891
Nqo1	24314	1.51056	3.81493
Drd1a	24316	0.714198	0.697975
Drd1a	24316	0.836115	0.955923
Drd2	24318	1.50849	0.992336
Edn2	24324	2.63037	1.84235
Egfr	24329	0.654159	2.3526
Egfr	24329	0.415429	5.5056
Eno1	24333	0.856079	2.08476
Epo	24335	0.527582	2.67746
Fabp1	24360	1.65614	1.33528
Fgb	24366	1.48763	10.9553
Fgb	24366	0.623654	1.29399
Fgb	24366	1.14158	0.930281
Fgg	24367	1.5406	9.12551
Fuca1	24375	0.74101	0.743881
G6pd	24377	0.895266	0.52408
Gc	24384	1.46423	2.00023
Gja1	24392	1.51259	0.83623
Grik5	24407	0.727612	0.691684
Gstm2	24424	1.28145	6.74619
Gstp1	24426	1.36542	36.3568
Igf2	24483	0.799605	0.729908
Igf2	24483	0.647342	1.85628
Ins2	24506	1.11427	2.66527
Klk1l	24523	1.13166	0.750725
Kras	24525	0.823501	2.95263
Lepr	24536	2.13176	0.507214
Lepr	24536	0.627352	0.657537
Lepr	24536	1.34828	0.55567
Lipc	24538	0.673411	3.04713
Met	24553	0.722758	0.536698
Muc1	24571	1.51467	3.62934
Myh11	24582	0.563492	1.25532
Myh11	24582	1.16834	0.988636
Ncam1	24586	0.529079	0.803469
Nf1	24592	0.470447	1.23455
Nf1	24592	1.49415	1.57149
Klk1b3	24594	1.84195	1.28484
Serpina1	24648	1.46403	0.599316
Pkd1	24650	0.798882	0.524557
Pklr	24651	0.697472	5.10603
Ptgs1	24693	0.713456	0.699401
Ptgs1	24693	0.716562	3.58722
Pygm	24701	1.25819	1.77442
Ret	24716	0.870168	0.797509
Acsm3	24763	0.694037	2.17793
Scnn1b	24767	1.61911	0.88733
Scnn1g	24768	0.741076	4.71891
Sdc4	24771	1.54294	3.94338
Slc9a1	24782	0.726576	0.521013
Slc9a1	24782	1.3476	0.834536
Slc9a3	24784	1.1287	1.132
Sord	24788	0.897368	1.18419
Sparc	24791	0.595033	1.74648
Sparc	24791	0.675812	2.71849
Serpina3n	24795	1.31684	0.853879
Sst	24797	0.85675	1.80449
Sts	24800	0.889225	1.15525
Tac1	24806	1.3346	0.997618
Tacr1	24807	0.725202	1.98905
Tacr3	24808	0.351459	1.27492
Tap1	24811	1.45718	0.654443
Tbxa2r	24816	0.579054	0.751545
Srprb /// Tf	24825	0.828544	1.1941
Srprb /// Tf	24825	0.624586	0.624112
Tgfa	24827	1.5721	27.8761
Thrb	24831	1.20485	2.81671
Thrb	24831	1.27483	2.70993
Tpm1	24851	0.675305	1.16088
Vdr	24873	1.468	1.39999
Vhl	24874	0.831385	1.16835
Slc6a3	24898	0.846173	1.12577
Lox	24914	0.549688	1.21942
Lox	24914	0.579697	1.02636
Adrb1	24925	1.51698	1.16788
Lamp2	24944	0.879852	0.543793
Srd5a1	24950	0.842597	3.87609
Acat1	25014	1.2098	1.3363
Prkcb	25023	0.866522	1.62715
Eln	25043	0.290099	1.5531
Eln	25043	0.403977	1.30025
Glp1r	25051	0.526583	4.38155
Ntrk2	25054	0.499622	2.17582
Ntrk2	25054	0.552086	0.624998
Ntrk2	25054	0.523945	2.17992
Scarb1	25073	0.769952	1.61182
Scarb1	25073	0.771265	1.45562
Htr1b	25075	1.17354	0.866241
Apoa4	25080	0.763041	1.23921
Apoa1	25081	1.94456	1.22363
Adra2a	25083	0.492641	1.02719
Pld2	25097	0.66041	1.19978
Chrm4	25111	0.601309	1.06235
Itga1	25118	0.792739	21.2241
Pcsk2	25121	1.28465	0.650924
Scnn1a	25122	0.390726	1.35862
Scnn1a	25122	1.68462	1.75482
Cyp19a1	25147	0.707935	2.81077
Mas1	25153	0.833163	0.611694
Sp4	25162	0.822218	0.611138
Casp1	25166	1.11006	1.444
Fhl1	25177	0.788288	0.74645
Ccnb1	25203	0.737664	2.05093
Ccnb1	25203	0.725247	1.72602
Sdc1	25216	0.773513	1.17701
Add3	25230	0.86376	1.02442
Tyro3	25232	0.886444	0.677823
Gpc3	25236	0.597595	0.652851
Adrbk1	25238	1.23671	0.732224
Adrbk1	25238	0.734469	1.09441
Apod	25239	0.731294	1.20936
Aqp1	25240	1.15213	19.8287
Bdkrb2 /// RGD1308470	25245	0.609599	1.13019
Cnr1	25248	0.793618	0.783135
Cnr1	25248	1.23654	2.05005
Gstt1	25260	0.474786	2.36676
Pdgfra	25267	0.725802	1.31617
Proc	25268	0.701079	0.717875
Smo	25273	0.715607	0.954254
Cnp	25275	0.62137	1.1569
Cnp	25275	0.791755	0.875169
Igfbp5	25285	0.683699	3.71972
Igfbp5	25285	0.723679	16.8676
Igfbp5	25285	0.678723	1.14328
Igfbp5	25285	0.609098	0.898769
Bmp4	25296	0.720228	0.520876
Fgf1	25317	0.75542	0.637199
Mgp	25333	0.796593	1.00852
Npy5r	25340	2.1662	1.88397
Tnfrsf11b	25341	0.622233	2.04652
Oxtr	25342	0.823836	1.34707
Sod3	25352	0.662545	1.31815
Spp1	25353	0.46014	0.763844
Actg2	25365	0.454099	1.03761
Acvr2b	25366	1.14465	2.65407
Adora2a	25369	2.01939	200.82
Adrbk2	25372	1.3271	4.67437
Ahsg	25373	1.12399	1.79024
Alad	25374	1.10826	0.52981
Aldh3a1	25375	0.556929	0.8074
Anxa1	25380	0.767166	0.87825
Anxa1	25380	0.894815	0.517697
Arrb1	25387	0.453442	1.23052
Arrb2	25388	0.88022	0.556271
Atp2a3	25391	0.858644	0.533015
Cyp1b1	25426	0.661344	3.28411
Gfra1	25454	0.819075	1.04194
Msx2	25483	1.89248	1.57204
Nes	25491	0.782187	2.36007
Oxt	25504	0.481252	7.35065
Prkcz	25522	1.16505	0.881804
Ptgis	25527	0.625819	1.24677
Rock2	25537	0.748503	1.05957
Rock2	25537	0.827725	0.858467
Slc34a1	25548	0.812117	2.84561
Slc34a1	25548	1.61994	0.621757
Slc2a3	25551	1.14151	2.38769
Slc6a4	25553	0.751144	8.52525
Il1rl1	25556	2.16841	0.541077
Star	25557	0.532404	0.946965
Abcc9	25560	0.752206	1.06877
Trh	25569	0.446989	0.852938
Trhr	25570	1.21267	6.3128
Trhr	25570	0.491952	0.742746
Id2	25587	0.621292	1.30969
Kdr	25589	1.11574	7.12905
Chrna4	25590	1.11899	33.8551
Map2	25595	1.25156	1.10381
Map2	25595	0.713689	2.09074
Ptk2	25614	0.580644	1.42244
Ptpn11	25622	1.11941	0.857126
Fkbp1a	25639	0.856208	1.37619
Fkbp1a	25639	0.877047	1.22762
Bmp6	25644	1.44686	1.3442
Bmp6	25644	0.818028	1.61208
Adrb3	25645	0.805088	1.77793
Gja4	25655	0.768711	1.09222
Cd28	25660	0.879539	1.44367
Scn5a	25665	1.21135	1.18539
Scn5a	25665	1.17388	1.92027
Cd38	25668	0.813099	2.65993
Cd38	25668	0.887736	0.840614
Cd38	25668	0.794178	4.83586
Anxa5	25673	0.879531	0.666118
Hmgcr	25675	1.34808	1.29181
Ddr1	25678	0.881147	2.00791
Slc18a1	25693	0.566379	3.01841
Vldlr	25696	0.741307	3.21504
Vldlr	25696	0.755909	1.51984
Vldlr	25696	0.64297	2.00993
Ass1	25698	0.820393	0.919876
Dbh	25699	1.1517	0.983548
Tgfb3	25717	0.583275	0.800392
Prkar1a	25725	1.11539	2.30028
Apoe	25728	0.62671	0.6603
Apoe	25728	0.611881	1.45585
Ccne1	25729	0.669802	1.09189
S100b	25742	0.69254	0.764626
Ppara	25747	2.58762	0.822018
Dcn	29139	0.874464	1.42081
Gal	29141	6.51805	23.4045
Grn	29143	0.846169	0.925747
Mstn	29152	1.8629	6.6604
Fbln5	29158	0.511856	1.16302
Ctsk	29175	0.48288	1.21472
Uts2	29180	1.21214	5.33407
Tac2	29191	0.527073	1.0382
Psen1	29192	0.854919	2.24642
Hfe	29199	0.535566	2.00192
Arg2	29215	1.56198	0.557151
Lrp2	29216	1.26555	35.5062
Arg1	29221	0.696663	4.5582
Drd3	29238	1.93911	0.671354
Polb	29240	1.17888	3.06218
Sell	29259	0.725704	0.896651
Clip2	29264	0.743809	1.59386
Actc1	29275	1.4156	1.22751
Adora1	29290	1.61476	1.19916
Gata6	29300	1.15797	33.8476
Gata6	29300	1.78525	0.790516
Gata6	29300	0.841827	17.9378
Gpr182	29307	0.812237	2.13505
Gpr182	29307	0.776832	0.588623
Prkce	29340	1.3919	0.587487
Npy1r	29358	0.703309	0.660954
Serpine2	29366	0.511918	1.11003
Ccl11	29397	0.569657	3.97411
Pak1	29431	0.643403	0.798802
Por	29441	1.28674	10.5453
Epas1	29452	1.16412	2.88266
Aoc3	29473	0.772227	0.840668
Aoc3	29473	0.818805	0.845069
Notch2	29492	0.815469	6.22505
Notch2	29492	0.729942	0.971923
Pdx1	29535	1.42456	3.51004
Map2k5	29568	0.889772	0.667086
Tgfbr1	29591	0.837993	1.46696
Alox5ap	29624	0.806062	0.733235
Ptprj	29645	0.76958	0.516778
Arntl	29657	0.364563	7.69466
P2rx4	29659	0.766986	0.824996
Scn1b	29686	0.876474	11.828
Atp2a2	29693	1.16886	2.04168
Atp2a2	29693	1.2185	0.785086
Prkar2a	29699	0.861153	0.955823
Scn8a	29710	1.36235	1.92142
Kcnj5	29713	0.646312	0.990806
Slc8a1	29715	0.814139	0.854132
Cacna1g	29717	0.520788	1.16294
S1pr1	29733	0.392736	1.48474
S1pr1	29733	1.1854	1.22428
Kcnmb1	29747	0.563893	0.778858
Ppp3r1	29748	0.833377	1.50367
LOC300429 /// Ppp3r1	29748	1.16794	0.77789
Gja5	50563	2.27802	1.15694
Gria1	50592	0.680713	0.554544
Ctss	50654	0.684114	0.780219
Runx1	50662	0.601159	0.850016
Ednrb	50672	0.827421	0.583385
Sftpc	50683	1.59974	1.45315
Plaur	50692	0.767268	0.945952
Apob	54225	1.20162	0.753457
Apob	54225	2.59962	0.997913
Rgs5	54294	0.775274	3.33219
Slk	54308	0.665591	2.09601
Slk	54308	0.892003	0.909095
Tgm2	56083	0.804209	1.54019
Tgm2	56083	0.772433	1.42301
Kcnip2	56817	1.11817	0.877509
Cd86	56822	0.858755	1.02254
Cd86	56822	0.621399	1.34066
Adam17	57027	0.682566	3.2384
Ccr1	57301	0.867729	1.06899
Uts2r	57305	2.04333	2.83193
Nt5e	58813	0.850413	0.767258
Txnrd1	58819	1.16362	9.29876
Gas6	58935	0.633943	0.86391
Gas6	58935	0.872808	2.97259
Gas6	58935	0.741512	0.582706
Ptafr	58949	0.76496	0.91146
Fkbp1b	58950	0.41129	1.14559
Crhr1	58959	0.694447	0.575146
Crhr1	58959	1.71436	1.23036
Slco1b2	58978	1.43547	1.47769
Slco1b2	58978	0.698306	1.2977
Grk4	59077	1.47787	1.33863
Ltbp2	59106	0.426289	0.710368
Hand1	59112	0.433266	5.60435
Hcn4	59266	0.526138	1.81789
F13a1	60327	0.629387	1.27932
F13a1	60327	0.625423	3.73057
Gnb3	60449	1.37689	15.0451
Gnb3	60449	1.24207	1.64928
Ccr2	60463	0.492582	3.2167
Il1rn	60582	0.641108	0.679524
Actn4	63836	0.739046	0.984363
Stc2	63878	0.762795	1.43248
Kcne3	63883	0.487221	1.65473
Slc29a1	63997	0.832912	0.758008
Casp7	64026	1.21217	1.31096
Ctgf	64032	0.666966	0.828196
Ccnd2	64033	0.59279	1.18725
Cd55	64036	0.753296	0.728599
Xylt2	64134	0.874834	1.01073
Xylt2	64134	0.839349	0.767755
Ddah1	64157	0.83927	8.55668
Ascl1	64186	1.35772	2.57817
Qdpr	64192	1.11913	1.22423
Sncg	64347	0.715337	0.964797
Cdc42	64465	0.876405	1.94468
Slc30a4	64469	0.809006	1.12069
Rbm10	64510	1.60604	0.752014
Fzd2	64512	0.684565	0.897582
Icos	64545	0.655749	1.26582
Adnp	64622	1.11176	1.89557
Mbl2	64668	0.719402	1.27797
Pln	64672	1.53444	0.725092
Crhr2	64680	1.26858	0.808478
P2ry12	64803	0.747997	0.650917
Bche	65036	0.851073	1.70396
Inppl1	65038	0.893038	2.29362
Serpina5	65051	0.173256	1.29208
Lphn1	65096	0.632192	1.25857
Cyp2j4	65210	0.896657	0.510394
Cybb	66021	0.825075	0.549268
Cybb	66021	0.747784	0.770641
Scn9a	78956	3.03041	4.1159
Slc6a1	79212	0.651221	1.14208
Slc6a11	79213	0.471615	1.59293
Mtpn	79215	0.897513	0.584912
Mtpn	79215	0.80936	1.06584
Mtpn	79215	0.813094	0.970123
Igfals	79438	2.10549	5.13255
Txn2	79462	1.26894	1.12839
Itga7	81008	1.73335	0.885369
Cxcl1	81503	2.30764	10.2405
Mdk	81517	0.717804	0.836875
Myoc	81523	0.893247	1.44317
Nov	81526	0.325015	1.15888
Abat	81632	0.571992	0.83653
Actn1	81634	0.719588	0.820054
Actn1	81634	0.678688	0.934235
Crh	81648	0.626041	1.32215
Gabbr1	81657	0.355741	1.11
Gabbr1	81657	0.556371	0.845284
Gabbr1	81657	0.8596	1.14575
Gabbr1	81657	0.865466	1.63312
Hnmt	81676	2.11729	0.604156
Lum	81682	0.51801	5.90506
Mmp14	81707	0.528184	1.17811
Mmp14	81707	0.71375	1.08254
Prkch	81749	0.884691	1.67339
Pros1	81750	0.684101	1.04202
Psen2	81751	1.1218	0.977688
Ccl5	81780	0.787723	0.778838
Stc1	81801	0.890895	0.680058
Stc1	81801	0.717517	4.67062
Stc1	81801	0.700625	0.882574
Tgfb2	81809	0.700836	0.662618
Tgfb2	81809	0.7578	0.566911
Tgfb2	81809	0.72555	0.844089
Tgfb2	81809	0.736798	0.554162
Tgfbr2	81810	0.70683	0.526072
Thpo	81811	0.635131	1.05024
Thra	81812	0.743036	32.6618
Vim	81818	0.734009	1.22451
Actb	81822	0.857046	7.26145
Actb	81822	0.790026	3.49583
Actb	81822	0.834072	4.52318
Actb	81822	0.746253	4.63057
Actb	81822	0.808038	2.39384
Kl	83504	0.696319	1.68816
Kcnj11	83535	1.3043	1.57877
Casp6	83584	0.726839	0.835067
Cd82	83628	0.856805	0.816369
Dvl1	83721	1.19659	2.1942
Fbn1	83727	0.548228	1.25455
Fbn1	83727	0.506564	1.16928
Scd	83792	0.79637	0.869482
Scd	83792	1.25266	3.17537
Ltbp3	83838	0.546961	1.03215
Crot	83842	0.809543	1.44326
Crot	83842	0.774462	0.902918
C3ar1	84007	1.19155	1.45699
Kalrn	84009	1.71262	1.51676
Kalrn	84009	0.79346	0.94741
Kalrn	84009	0.769823	0.8331
Dll1	84010	2.18132	0.836682
Pon1	84024	0.7121	0.938482
Col1a2	84352	0.489066	2.09614
Col1a2	84352	0.504908	2.08801
Klf5	84410	1.20612	0.742678
Klf5	84410	1.28839	3.45332
Cxcr3	84475	0.855319	4.64452
Col5a2	85250	0.542498	1.49433
Hrh3	85268	1.84933	1.26428
Hrh3	85268	0.713367	1.00908
Bmp7	85272	1.33147	1.84811
Shc1	85385	0.647857	0.896273
Col5a1	85490	0.518898	1.16833
Col5a1	85490	0.538321	1.17995
Lbr	89789	0.835379	1.33691
Sfrp4	89803	0.714104	1.64289
Sfrp4	89803	1.32441	0.694778
Angpt1	89807	0.830433	0.791828
Cx3cl1	89808	1.32362	1.33274
Tnfsf4	89814	0.850715	5.46192
Socs3	89829	1.16823	1.69331
Pgf	94203	0.791697	0.541385
Cpb2	113936	1.33354	3.4118
Cxcl2	114105	2.13416	11.2446
Vegfc	114111	0.72476	1.78228
Vcan	114122	0.751619	0.85981
Vcan	114122	0.829702	2.46158
Vcan	114122	0.736802	0.876593
Vcan	114122	0.751118	0.614987
Vcan	114122	0.878374	0.576336
Akap1	114124	0.774637	3.95346
Chek2	114212	0.827664	3.18036
Nox1	114243	0.589593	0.998272
Ccl28	114492	0.739745	2.67867
Map2k6	114495	1.16146	2.2894
Wnk1	116477	0.484665	0.840883
Wnk1	116477	0.837457	1.38072
Wnk1	116477	0.775535	2.36112
Wnk1	116477	0.74079	1.10898
Slc9a3r2	116501	1.143	0.707789
Bak1	116502	1.13947	0.997005
Plod1	116552	0.782659	0.792525
Il13	116553	1.61323	1.15043
Lrpap1	116565	0.890349	0.6012
Fcgr2a /// LOC498276 /// LOC498277	116591	0.736224	0.732758
Fcgr2a /// LOC498276	116591	0.69906	0.72938
Cacnb2	116600	1.213	11.0329
Csf2	116630	2.01445	0.786114
Csf2	116630	1.4025	4.17435
Nat1	116631	0.851331	0.597225
Nat1	116631	0.829116	1.73695
Nat1 /// Nat2	116632	0.871193	0.92065
Tnc	116640	0.824108	1.59851
Dusp6	116663	0.727609	2.22025
Aldh1a2	116676	0.799813	1.01372
Abcc5	116721	0.891194	0.87957
Lpar1	116744	0.683602	1.54362
Lpar1	116744	0.848212	4.30297
Kcnh2	117018	0.865416	1.0465
Eif2b4	117019	1.14374	4.09009
Ccr3	117027	0.763908	3.99722
Ccr5	117029	0.627573	1.81056
Mt3	117038	0.846568	1.11148
Csrp3	117505	0.877358	0.834689
Keap1	117519	1.36945	1.157
Kbtbd10	117537	0.767603	2.78195
Mylk2	117558	0.877381	2.1088
Slc8a2	140447	1.14503	0.71234
Bmpr2	140590	1.73863	0.915344
Apoa5	140638	1.96913	4.26397
Olr1	140914	0.476135	1.10483
Mgea5	154968	0.796775	5.59879
Cfh	155012	0.661993	1.00361
Abcg8	155192	0.734865	1.39915
Casp12	156117	0.837804	0.605415
Prkcd	170538	0.884556	0.703297
Lphn3	170641	0.703489	0.871968
Hadha	170670	0.881276	6.33245
Hadha	170670	1.19812	2.20487
Ucn2	170896	1.3324	1.08157
Lonp1	170916	0.682295	0.622511
Cysltr2	170926	0.461836	2.43561
Akap5	171026	1.88226	6.3147
Il13ra2	171060	0.708661	1.96784
Csf2rb	171081	1.69545	0.783041
Kcne2	171138	1.71956	2.99184
Kcne2	171138	0.562157	0.682273
Kcne2	171138	0.584081	4.18906
Eif2b3	171145	1.16476	2.03145
Cyp3a9	171352	0.725987	0.804968
Foxc2	171356	0.564809	0.93201
Foxc2	171356	2.41126	5.32087
Nme1	191575	0.777849	2.60879
Acot1 /// Acot2	192272	0.874275	10.0101
Scn3b	245956	0.689279	0.663495
Scn3b	245956	0.618535	0.770344
Alg10b	245960	1.1467	2.33518
Prlhr	246075	0.442468	1.94246
Akap9	246150	1.15018	9.04961
Adipoq	246253	0.564995	1.30619
Optn	246294	1.35162	1.48097
Serpina4	246328	1.39691	0.514412
Socs1	252971	0.714368	2.69015
Aptx	259271	0.753183	2.06124
Cyp4a8	266674	1.4066	0.639749
Rcan1	266766	0.564949	2.73292
Tnfrsf17	287034	0.781278	4.18818
Tnfrsf17	287034	1.17909	0.601698
Ccl7	287561	1.28929	3.38053
Mylk	288057	0.774006	1.66168
Mylk	288057	0.604062	0.710213
Mospd3	288557	0.894474	0.686457
Stat2	288774	1.16519	2.02801
Glmn	289437	0.865627	0.680976
Glmn	289437	1.19557	0.695948
Col4a1	290905	0.608944	1.81219
Col4a1	290905	0.69715	1.2129
Mki67	291234	0.724215	0.859465
Hspa9	291671	1.10155	0.698923
Dsg1b	291755	1.79723	13.9502
Dsg1b	291755	1.58126	2.96355
Dsc2	291760	1.12587	2.97542
Thbs2	292406	0.645893	1.14641
Apoc2	292697	0.221345	2.05206
Ltbp4	292734	0.655875	2.01508
Bag3	293524	0.355051	0.852331
Flna	293860	0.768169	1.46222
RT1-Db1	294270	2.16446	1.41305
RT1-Db1	294270	0.74954	7.74152
Hla-dma	294274	0.740139	0.826905
Acad9	294973	0.834735	0.877139
S100a1	295214	1.16043	0.590617
Ptpn22	295338	2.37822	1.5303
Rhoc	295342	0.693178	1.32709
Myl9	296313	0.576074	1.92737
Pltp	296371	1.34946	11.3265
Pltp	296371	0.882298	0.578641
Itgav	296456	0.866305	0.592021
Pon2	296851	0.778812	0.84189
Nampt	297508	1.11344	2.65134
Agtrap	298646	0.87181	0.895492
Emilin1	298845	0.63612	0.974486
Lamb1	298941	0.737152	1.3607
Lrp1	299858	0.784991	0.670276
Ldlr	300438	0.703109	0.994272
Sp110	301570	0.848446	4.23054
F8	302470	0.823148	0.857939
F8	302470	1.14775	0.975428
F8	302470	1.51602	2.08503
Ace2	302668	0.760472	2.08159
Mapk8ip3	302983	0.89744	4.74247
Mapk8ip3	302983	0.683171	1.31348
Sgca	303468	1.14899	2.29625
F5	304929	0.796227	0.808549
Fcgr3a	304966	1.44876	2.53551
Ccm2	305505	0.878148	9.48741
Vcl	305679	1.19668	1.01377
Ank1	306570	0.773453	0.552842
Ank1	306570	1.2839	1.28187
Tcfap2a	306862	0.39938	1.7386
Dtna	307548	0.851707	1.06575
Sae1	308384	0.699412	0.935841
Lama2	309368	0.839733	1.09383
Cox15	309391	1.20313	0.677537
Nfkb2	309452	1.15561	1.86422
Rbm20	309544	1.15878	2.39677
Rbm20	309544	1.14257	1.95416
RT1-Ba	309621	0.649485	1.1334
RT1-Bb	309622	9.89062	2.66547
LOC688090 /// RT1-Bb	309622	0.452946	1.73939
Adamtsl2	311827	0.376068	1.08264
Pon3	312086	0.77273	0.988128
Nrf1	312195	0.88473	3.79217
Abcg2	312382	0.88615	1.64106
Usp18	312688	1.77276	0.639293
Lck	313050	0.713311	0.964839
Cyp2j3	313375	0.840169	5.34357
C8b	313421	0.884662	0.757232
L2hgdh	314196	0.820156	1.23831
Stk11	314621	1.45228	1.12226
Zfpm2	314930	0.536022	0.751149
Zfpm2	314930	0.858799	1.66044
Cbx6	315136	0.878211	1.08394
Fbln1	315191	0.641775	1.37152
Fbln1	315191	0.746532	2.06807
Armet	315989	1.12578	3.21322
Ankrd23	316330	0.558709	0.725597
Epha4	316539	0.6347	4.86212
Epha4	316539	0.857451	1.74557
Epha4	316539	0.804154	0.541717
Epha4	316539	0.647735	2.34605
Tbx3	353305	2.61218	16.0305
Tbx3	353305	2.47131	1.18548
Hsd3b1	360348	1.75148	4.5733
Tbx1	360737	1.86059	0.645156
Wdr36	361305	1.11977	17.4365
Dnajc4	361717	1.16952	3.13396
Fga	361969	2.43549	2.55585
Fga	361969	1.73335	0.792458
Ank2	362036	1.88759	1.84035
Ank2	362036	1.24645	0.925714
C5	362119	0.474543	0.656282
Tmem43	362401	0.763378	0.828038
Bdkrb2 /// RGD1308470	362778	0.588112	0.825225
RGD1308470	362778	0.895509	1.24345
Stat6	362896	0.789988	0.724933
Stra6	363071	1.23183	1.37135
Stra6	363071	0.365642	0.999464
Foxp4	363185	0.536613	2.39272
Cav2	363425	0.861712	7.80674
Gla	363494	0.884705	0.806141
Rac1	363875	0.880966	0.672582
rCG_44068	364706	0.85949	1.69226
Sox4	364712	0.593884	1.74107
Sox4	364712	0.66913	3.63169
Sox4	364712	0.604088	2.65482
Sox4	364712	0.72447	2.17645
Sox4	364712	0.573085	1.73427
Prkag2	373545	1.8844	4.52793
Notch4	406162	1.42191	0.587197
Cps1	497840	1.48394	4.39341
Golt1a	498230	2.83701	20.5466
RGD1565551	499807	3.05159	8.47625
RGD1565551	499807	0.863676	1.54921
Cyp11b1 /// Cyp11b2 /// Cyp11b3	500892	0.899993	5.88619
Cbl	500985	0.837941	0.634091
Cbl	500985	0.851615	1.20234
Srf	501099	1.13632	0.651746
Fbn2	689008	0.2477	1.12858
Ryr2	689560	0.862188	31.3737
Trex1	100049583	1.10798	0.662316
