# Supplementary material for: A Network Study of Chinese Medicine Xuesaitong Injection to Elucidate a Complex Mode of Action with Multicompound, Multitarget, and Multipathway
Source: Hindawi journal article supplement (doi:10.1155/2013/652373), 2013-01-01
Supplement: f3 [file 652373.f3.xlsx]

## Sheet: Sheet1
TARGET	EntrezGeneID	GENENAME
ACE	24310	Ace
ACTA2	81633	Acta2
Adam10	29650	Adam10
Adipoq	246253	Adipoq
ADRBK1	25238	Adrbk1
ADRBK2	25372	Adrbk2
AIF1	29427	Aif1
APP	54226	App
Ar	24208	Ar
Bad	64639	Bad
BCL2L1	24888	Bcl2l1
CASP3	25402	Casp3
CASP9	58918	Casp9
CCNA2	114494	Ccna2
CCND1	58919	Ccnd1
CCNE1	25729	Ccne1
CDK5	140908	Cdk5
CDKN1A	114851	Cdkn1a
CDKN2A	25163	Cdkn2a
CKM	24265	Ckm
COL1A1	29393	Col1a1
COL1A2	84352	Col1a2
COL3A1	84032	Col3a1
CREB1	81646	Creb1
crp	25419	Crp
Cycs	84353	Ctnnb1
CYP1A1	245920	Cxcl10
CYP2C9	24296	Cyp1a1
DSPP	114856	Dusp1
FN1	25661	Fn1
Fosl1	25445	Fosl1
FOXO1	84482	Foxo1
GLUT4	25139	Slc2a4
GRK4	59077	Grk4
IGF1	24482	Igf1
IL1B	24494	Il1b
IL4	287287	Il4
ITGB2	309684	Itgb2
Map2	25595	Map2
MAPK8	116554	Mapk8
MMP2	81686	Mmp2
MMP7	25335	Mmp7
NFKBIA	25493	Nfkbia
NGF	310738	Ngf
NOS1	24598	Nos1
NOS2	24599	Nos2
NOS3	24600	Nos3
NPPA	24602	Nppa
NPY	24604	Npy
NR2A	24409	Grin2a
NRAS	24605	Nras
NTRK1	59109	Ntrk1
PDGFRB	24629	Pdgfrb
PLAT	25692	Plat
PLAU	25619	Plau
Prkar2a	29699	Prkar2a
PTGS2	25522	Prkcz
PTK	29527	Ptgs2
RHOA	117273	Rhoa
SERPINE1	24617	Serpine1
SERPINF1	287526	Serpinf1
Smad1	25671	Smad1
Socs3	89829	Socs3
SOD3	25352	Sod3
STK11	314621	Stk11
TH	25085	Th
TIMP1	116510	Timp1
Tjp1	292994	Tjp1
TNFA	24835	Tnf
TP53	24842	Tp53
